# Supplementary material
Source: Springer Nature journal article supplement (https://www.springermedizin.de/resource/supplementary/13584_2012_57_MOESM4_ESM.pdf/9676970)

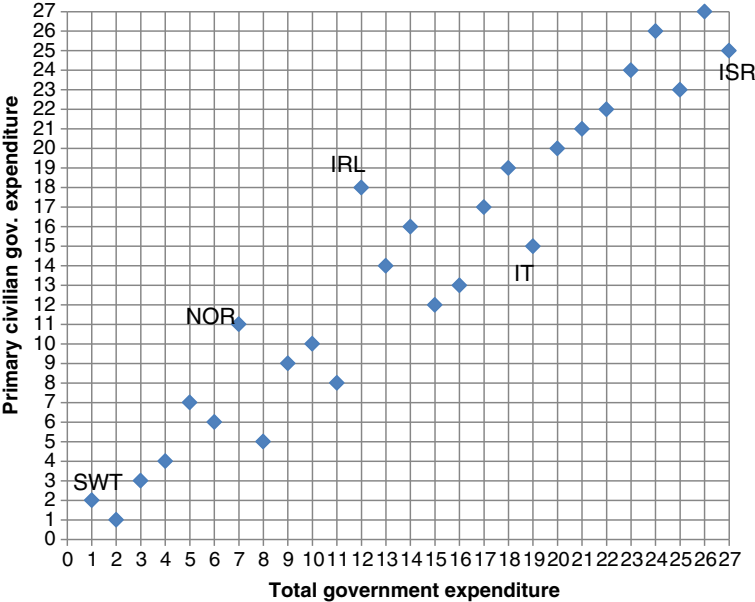

Supplement: MOESM4 [file 9676970]
